# Supplementary material for: Monoclinic to two-dimensional hexagonal transformation in hexacatenar molecules with a 1,2,3-triazole-based conjugated rod: morphology-dependent thermochromic behavior
Source: Royal Society of Chemistry journal article supplement (doi:10.1039/c4sm01051e), 2014-07-25
Supplement: c4sm01051e1.pdf [file c4sm01051e1.pdf]

Electronic Supplementary Information

**Monoclinic to Two-dimensional Hexagonal  
Transformation in Hexacatenar Molecules with a 1,2,3-  
Triazole-Based Conjugated Rod: Morphology-Dependent  
Thermochromic Behavior**

*Kyuwon Han and Byoung-Ki Cho\**

Department of Chemistry and Institute of Nanosensor and Biotechnology, Dankook  
University, Gyeonggi-Do, 448-701, Korea

\*Email: [chobk@dankook.ac.kr](mailto:chobk@dankook.ac.kr)

**Synthesis of the intermediate compounds.** The synthetic procedure is outlined in Scheme S1.

*Synthesis of 1,2,3,-tris(alkyloxy)benzene (1a and 2a).* 1,2,3,-Tris(octyloxy)benzene (**1a**) and 1,2,3,-tris(dodecyloxy)benzene (**2a**) were synthesized using the same procedure.<sup>S1</sup> A representative synthesis is described for compound **1a**. Pyrogallol (5.00 g, 39.65 mmol) and K<sub>2</sub>CO<sub>3</sub> (32.88 g, 237.89 mmol) were dissolved in 350 mL of DMF. To this mixture, 1-bromooctane (17.76 mL, 237.89 mmol) was added dropwise. The reaction mixture was heated to reflux for 1 day at 90 °C under N<sub>2</sub> atmosphere. After removing DMF using a rotary evaporator, the mixture was extracted with deionized water and DCM. The DCM layer was washed with deionized water several times, and then dried over anhydrous MgSO<sub>4</sub>. After removing DCM using a rotary evaporator, the resulting mixture was purified by silica gel column chromatography using an *n*-hexane:DCM = 4:1 solvent mixture as the eluent, yielding 15.21 g (82.91%) of a yellowish liquid. <sup>1</sup>H-NMR (CDCl<sub>3</sub>, δ, ppm): 6.91 (t, 1H, *J* = 8.2 Hz, Ar-*H*), 6.54 (d, 2H, *J* = 8.4 Hz, Ar-*H*), 3.95 (t, 6H, *J* = 6.2 Hz, OCH<sub>2</sub>CH<sub>2</sub>(CH<sub>2</sub>)<sub>5</sub>CH<sub>3</sub>), 1.78-1.76 (m, 6H, OCH<sub>2</sub>CH<sub>2</sub>(CH<sub>2</sub>)<sub>5</sub>CH<sub>3</sub>), 1.46-1.26 (m, 30H, OCH<sub>2</sub>CH<sub>2</sub>(CH<sub>2</sub>)<sub>5</sub>CH<sub>3</sub>), 0.88 (t, 9H, *J* = 6.8 Hz, OCH<sub>2</sub>CH<sub>2</sub>(CH<sub>2</sub>)<sub>5</sub>CH<sub>3</sub>).

*1,2,3,-Tris(dodecyloxy)benzene (2a).* Yield: 89.91%. <sup>1</sup>H-NMR (CDCl<sub>3</sub>, δ, ppm): 6.91 (t, 1H, *J* = 8.2 Hz, Ar-*H*), 6.54 (d, 2H, *J* = 8.2 Hz, Ar-*H*), 3.95 (t, 6H, *J* = 6.2 Hz, OCH<sub>2</sub>CH<sub>2</sub>(CH<sub>2</sub>)<sub>9</sub>CH<sub>3</sub>), 1.83-1.76 (m, 6H, OCH<sub>2</sub>CH<sub>2</sub>(CH<sub>2</sub>)<sub>9</sub>CH<sub>3</sub>), 1.46-1.26 (m, 54H, OCH<sub>2</sub>CH<sub>2</sub>(CH<sub>2</sub>)<sub>9</sub>CH<sub>3</sub>), 0.88 (t, 9H, *J* = 6.8 Hz, OCH<sub>2</sub>CH<sub>2</sub>(CH<sub>2</sub>)<sub>9</sub>CH<sub>3</sub>).

*Preparation of silica gel-supported nitric acid (HNO<sub>3</sub>·SiO<sub>2</sub>).* Silica gel (60.00 g, mesh size 70-230) was added to 8 *N* nitric acid (140 mL), and the mixture was stirred for 2 h at 23 °C. After filtration, the silica gel was left to dry for 3 days before it was stored in an airtight flask. The nitric acid content (20%) was determined by titration of a suspension of reagent (1.00 g) in water (50 mL), with 0.1 *N* NaOH using phenolphthalein as the indicator.

*Synthesis of 1,2,3-tris(alkyloxy)-5-nitrobenzene (1b and 2b).* 5-Nitro-1,2,3-tris(octyloxy)benzene (**1b**) and 1,2,3-tris(dodecyloxy)-5-nitrobenzene (**2b**) were synthesized using the same procedure.<sup>S1</sup> A representative synthesis is described for compound **1b**. Compound **1a** (14.00 g, 30.25 mmol) and HNO<sub>3</sub>·SiO<sub>2</sub> (14.50 g, 49.48 mmol) were dissolved in 250 mL of DCM. The reaction mixture was stirred at room temperature for 30 min under N<sub>2</sub> atmosphere. The mixture was then filtered. After removing DCM using a rotary evaporator, the resulting mixture was washed with methyl alcohol, and purified by silica gel column chromatography using *n*-hexane:DCM = 4:1 as the eluent, yielding 8.21 g (53.45%)

of a yellowish liquid. <sup>1</sup>H-NMR (CDCl<sub>3</sub>, δ, ppm): 7.46 (s, 2H, Ar-*H*), 4.04 (t, 6H, *J* = 5.8 Hz, OCH<sub>2</sub>CH<sub>2</sub>(CH<sub>2</sub>)<sub>5</sub>CH<sub>3</sub>), 1.87-1.70 (m, 6H, OCH<sub>2</sub>CH<sub>2</sub>(CH<sub>2</sub>)<sub>5</sub>CH<sub>3</sub>), 1.47-1.26 (m, 30H, OCH<sub>2</sub>CH<sub>2</sub>(CH<sub>2</sub>)<sub>5</sub>CH<sub>3</sub>), 0.88 (t, 9H, *J* = 6.8 Hz, OCH<sub>2</sub>CH<sub>2</sub>(CH<sub>2</sub>)<sub>5</sub>CH<sub>3</sub>).

*1,2,3-tris(dodecyloxy)-5-nitrobenzene (2b)*. Yield: 52.42%. <sup>1</sup>H-NMR (CDCl<sub>3</sub>, δ, ppm): 7.43 (s, 2H, Ar-*H*), 4.04 (t, 6H, *J* = 6.0 Hz, OCH<sub>2</sub>CH<sub>2</sub>(CH<sub>2</sub>)<sub>9</sub>CH<sub>3</sub>), 1.85-1.72 (m, 6H, OCH<sub>2</sub>CH<sub>2</sub>(CH<sub>2</sub>)<sub>9</sub>CH<sub>3</sub>), 1.47-1.26 (m, 54H, OCH<sub>2</sub>CH<sub>2</sub>(CH<sub>2</sub>)<sub>9</sub>CH<sub>3</sub>), 0.88 (t, 9H, *J* = 6.8 Hz, OCH<sub>2</sub>CH<sub>2</sub>(CH<sub>2</sub>)<sub>9</sub>CH<sub>3</sub>).

*Synthesis of 3,4,5-tris(alkyloxy)aniline (1c and 2c)*. 3,4,5-Tris(octyloxy)aniline (**1c**) and 3,4,5-tris(dodecyloxy)aniline (**2c**) were synthesized using the same procedure.<sup>S1</sup> A representative synthesis is described for compound **1c**. Compound **1b** (8.00 g, 15.76 mmol), hydrazine (14.68 mL, 472.26 mmol), and graphite (7.10 g) were dissolved in 200 mL of ethyl alcohol. The reaction mixture was heated to reflux for 24 h at 90 °C under N<sub>2</sub> atmosphere. After removing ethyl alcohol using a rotary evaporator, the mixture was extracted with deionized water and DCM. The DCM layer was washed with deionized water several times, and then dried over anhydrous MgSO<sub>4</sub>. After removing DCM using a rotary evaporator, the resulting mixture was washed with isopropyl alcohol, yielding 7.13 g (94.74%) of a yellowish liquid. <sup>1</sup>H-NMR (CDCl<sub>3</sub>, δ, ppm): 5.91 (s, 2H, Ar-*H*), 3.87 (t, 6H, *J* = 6.4 Hz, OCH<sub>2</sub>CH<sub>2</sub>(CH<sub>2</sub>)<sub>5</sub>CH<sub>3</sub>), 3.47 (s, 2H, Ar-NH<sub>2</sub>), 1.80-1.68 (m, 6H, OCH<sub>2</sub>CH<sub>2</sub>(CH<sub>2</sub>)<sub>5</sub>CH<sub>3</sub>), 1.44-1.28 (m, 30H, OCH<sub>2</sub>CH<sub>2</sub>(CH<sub>2</sub>)<sub>5</sub>CH<sub>3</sub>), 0.88 (t, 9H, *J* = 6.8 Hz, OCH<sub>2</sub>CH<sub>2</sub>(CH<sub>2</sub>)<sub>5</sub>CH<sub>3</sub>).

*3,4,5-Tris(dodecyloxy)aniline (2c)*. Yield: 87.43%. <sup>1</sup>H-NMR (CDCl<sub>3</sub>, δ, ppm): 5.91 (s, 2H, Ar-*H*), 3.87 (t, 6H, *J* = 6.4 Hz, OCH<sub>2</sub>CH<sub>2</sub>(CH<sub>2</sub>)<sub>9</sub>CH<sub>3</sub>), 3.47 (s, 2H, Ar-NH<sub>2</sub>), 1.81-1.71 (m, 6H, OCH<sub>2</sub>CH<sub>2</sub>(CH<sub>2</sub>)<sub>9</sub>CH<sub>3</sub>), 1.44-1.26 (m, 54H, OCH<sub>2</sub>CH<sub>2</sub>(CH<sub>2</sub>)<sub>9</sub>CH<sub>3</sub>), 0.88 (t, 9H, *J* = 6.8 Hz, OCH<sub>2</sub>CH<sub>2</sub>(CH<sub>2</sub>)<sub>9</sub>CH<sub>3</sub>).

*Synthesis of 5-azido-1,2,3-tris(alkyloxy)benzene (1d and 2d)*. 5-Azido-1,2,3-tris(octyloxy)benzene (**1d**) and 5-azido-1,2,3-tris(dodecyloxy)benzene (**2d**) were synthesized using the same procedure.<sup>S2</sup> A representative synthesis is described for compound **1d**. Compound **3a** (7.00 g, 14.65 mmol) was dissolved in 90 mL of THF and 60 mL of ACN. After cooling to 0 °C in an ice bath, *t*-butyl nitrite (6.97 mL, 58.60 mmol) and trimethylsilyl azide (7.70 mL, 58.60 mmol) were carefully added to the reaction mixture, which was then stirred at room temperature for 12 h under N<sub>2</sub> atmosphere. After removing solvent using a rotary evaporator, the resulting mixture was purified by silica gel column chromatography using *n*-hexane:DCM = 4:1 as the eluent, yielding 6.10 g (82.72%) of a yellowish liquid. <sup>1</sup>H-NMR (CDCl<sub>3</sub>, δ, ppm): 6.20 (s, 2H, Ar-*H*), 3.92 (t, 6H, *J* = 6.4 Hz, OCH<sub>2</sub>CH<sub>2</sub>(CH<sub>2</sub>)<sub>5</sub>CH<sub>3</sub>),

1.83-1.68 (m, 6H, OCH<sub>2</sub>CH<sub>2</sub>(CH<sub>2</sub>)<sub>5</sub>CH<sub>3</sub>), 1.45-1.28 (m, 30H, OCH<sub>2</sub>CH<sub>2</sub>(CH<sub>2</sub>)<sub>5</sub>CH<sub>3</sub>), 0.88 (t, 9H, *J* = 6.8 Hz, OCH<sub>2</sub>CH<sub>2</sub>(CH<sub>2</sub>)<sub>5</sub>CH<sub>3</sub>).

*5-Azido-1,2,3-tris(dodecyloxy)benzene (2d)*. Yield: 78.45%. <sup>1</sup>H-NMR (CDCl<sub>3</sub>, δ, ppm): 6.21 (s, 2H, Ar-*H*), 3.92 (t, 6H, *J* = 6.6 Hz, OCH<sub>2</sub>CH<sub>2</sub>(CH<sub>2</sub>)<sub>9</sub>CH<sub>3</sub>), 1.83-1.72 (m, 6H, OCH<sub>2</sub>CH<sub>2</sub>(CH<sub>2</sub>)<sub>9</sub>CH<sub>3</sub>), 1.45-1.26 (m, 54H, OCH<sub>2</sub>CH<sub>2</sub>(CH<sub>2</sub>)<sub>9</sub>CH<sub>3</sub>), 0.88 (t, 9H, *J* = 6.8 Hz, OCH<sub>2</sub>CH<sub>2</sub>(CH<sub>2</sub>)<sub>9</sub>CH<sub>3</sub>).

## References

(S1) V. Percec, E. Aqad, M. Peterca, J. G. Rudick, L. Lemon, J. C. Ronda, B. B. De, P. A. Heiney and E. W. Meijer. *J. Am. Chem. Soc.*, 2006, **128**, 16365-16372.

(S2) K. Barral, A. D. Moorhouse and J. E. Moses, *Org. Lett.*, 2007, **9**, 1809-1811.

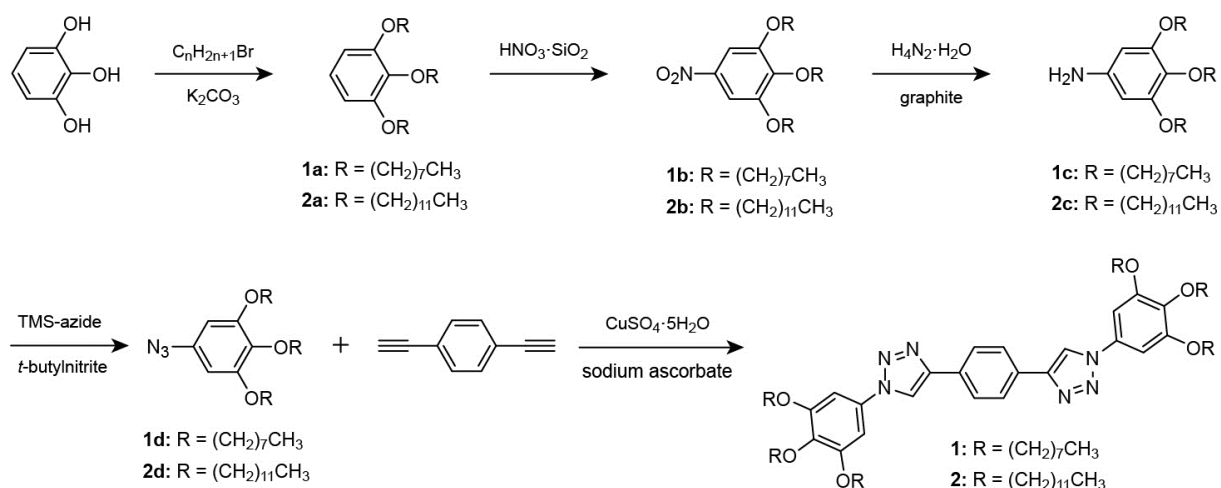

**Scheme S1.** Synthesis of hexacatenar molecules **1** and **2** via a click reaction.

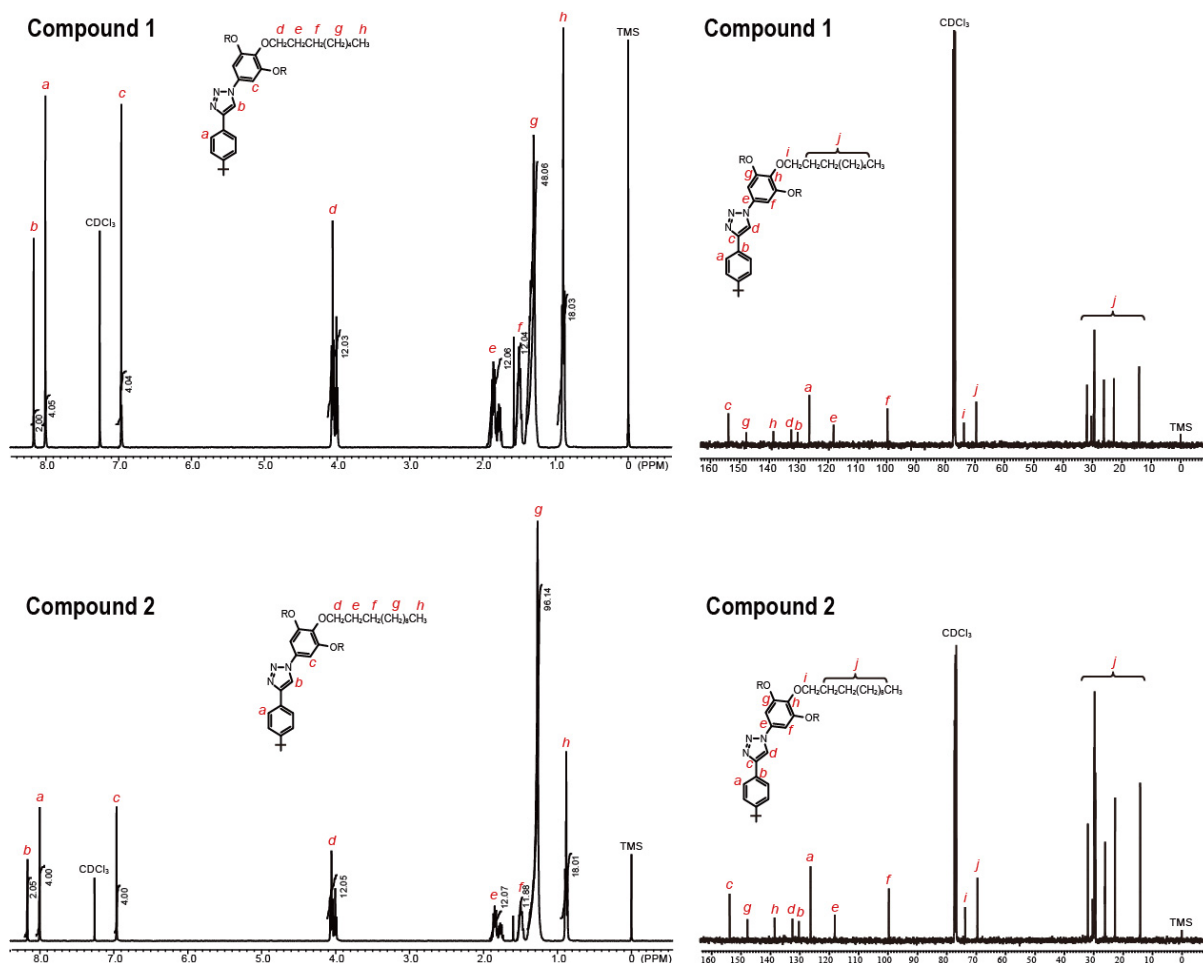

**Fig. S1**  $^1\text{H}$ - and  $^{13}\text{C}$ -NMR spectra of hexacatenar molecules **1** and **2**.

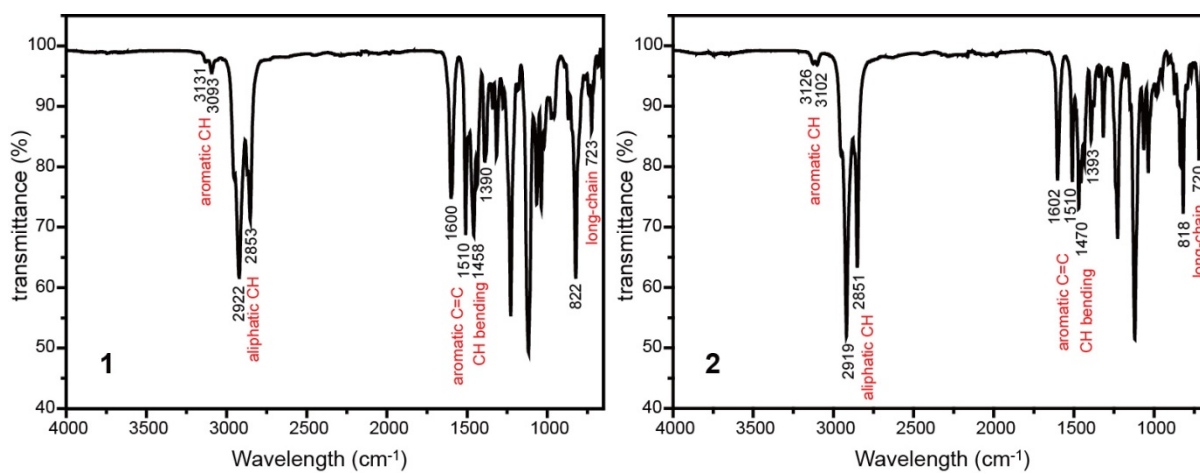

**Fig. S2** IR spectra of hexacatenar molecules **1** and **2**.

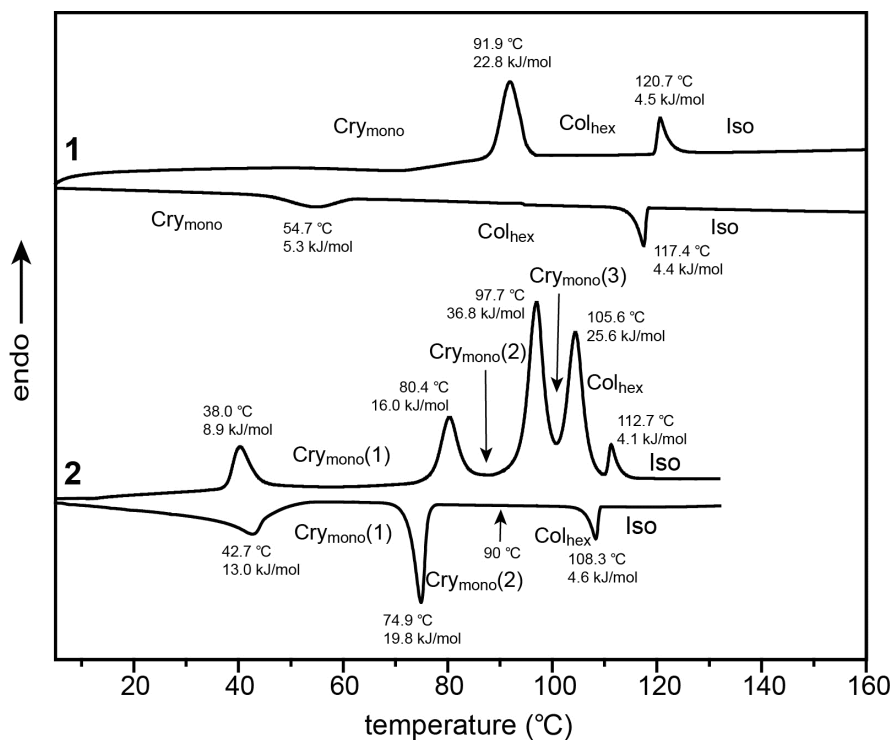

**Fig. S3** DSC thermograms of hexacatenar molecules **1** and **2**.

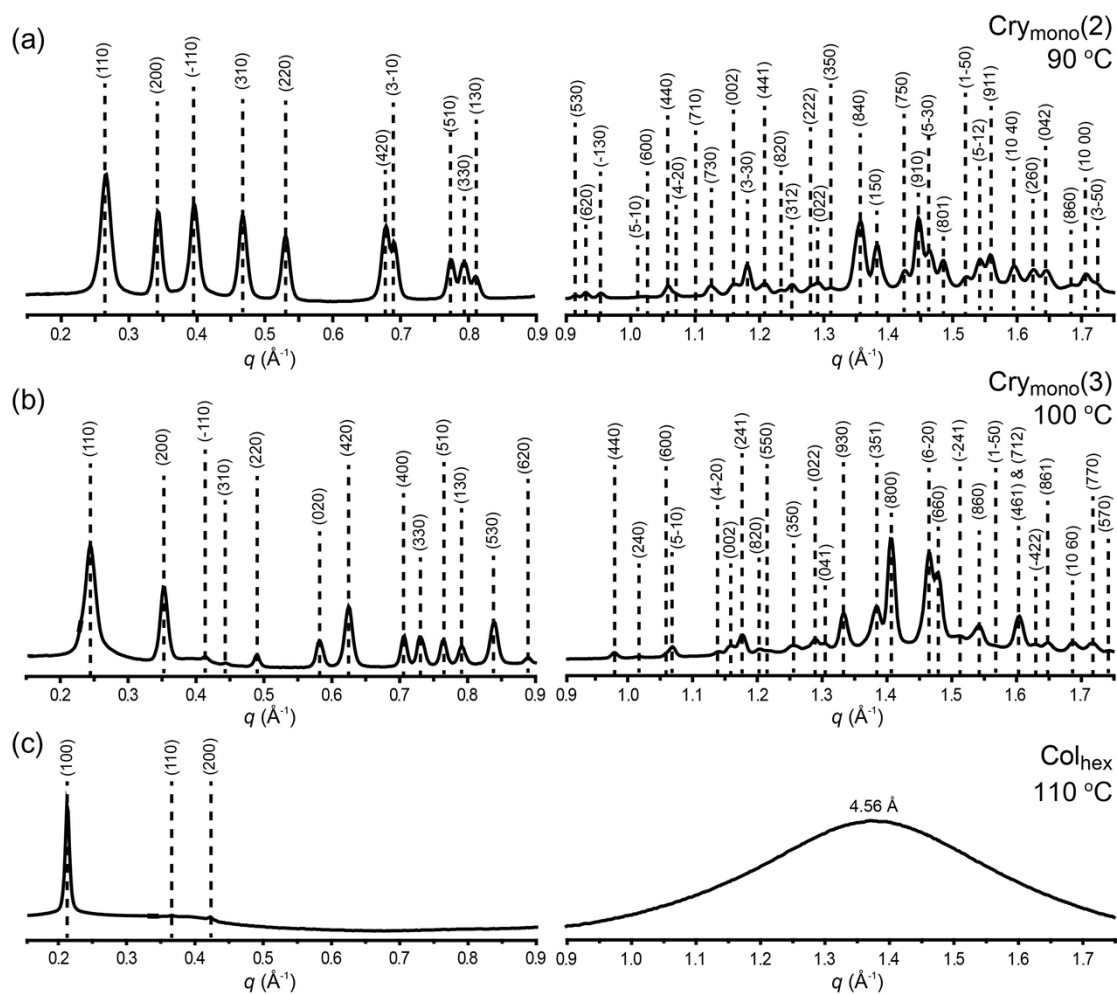

**Fig. S4** SAXS and WAXS data of **2** in the  $\text{Cry}_{\text{mono}}(2)$ ,  $\text{Cry}_{\text{mono}}(3)$  and  $\text{Col}_{\text{hex}}$  phases.

**Table S1.** Characterization of the X-ray data of **1**.

|                                 | $d_{\text{cal}}/\text{\AA}$ | $d_{\text{exp}}/\text{\AA}$ | $hkl$  | $d_{\text{cal}}/\text{\AA}$ | $d_{\text{exp}}/\text{\AA}$ | $hkl$  |
|---------------------------------|-----------------------------|-----------------------------|--------|-----------------------------|-----------------------------|--------|
| 30 °C<br>(Cry <sub>mono</sub> ) | 38.61                       | 38.60                       | (100)  | 5.66                        | 5.67                        | (230)  |
|                                 | 19.31                       | 19.26                       | (200)  | 5.52                        | 5.54                        | (130)  |
|                                 | 17.09                       | 17.13                       | (110)  |                             |                             | &(700) |
|                                 | 15.83                       | 15.87                       | (010)  | 5.41                        | 5.41                        | (530)  |
| Lattice parameters              | 15.43                       | 15.51                       | (210)  | 5.30                        | 5.29                        | (-610) |
|                                 | 12.87                       | 12.82                       | (300)  | 5.28                        | 5.29                        | (030)  |
| <b>a</b> = 41.7 Å               | 12.58                       | 12.62                       | (310)  | 5.23                        | 5.22                        | (-420) |
| <b>b</b> = 17.1 Å               | 10.46                       | 10.42                       | (-210) | 5.06                        | 5.08                        | (820)  |
| <b>c</b> = 10.4 Å               | 10.11                       | 10.10                       | (410)  | 4.98                        | 4.98                        | (-130) |
| <b>γ</b> = 67.8 °               | 9.65                        | 9.62                        | (400)  | 4.83                        | 4.83                        | (800)  |
|                                 | 8.87                        | 8.88                        | (111)  | 4.71                        | 4.71                        | (-520) |
|                                 | 8.41                        | 8.42                        | (120)  | 4.66                        | 4.66                        | (-230) |
|                                 | 7.92                        | 7.92                        | (020)  | 4.60                        | 4.60                        | (910)  |
|                                 | 7.72                        | 7.77                        | (420)  | 4.44                        | 4.44                        | (222)  |
|                                 |                             |                             | &(500) | 4.34                        | 4.34                        | (-330) |
|                                 | 7.13                        | 7.10                        | (-410) | 4.29                        | 4.30                        | (900)  |
|                                 | 7.01                        | 7.03                        | (520)  | 4.23                        | 4.23                        | (540)  |
|                                 | 6.51                        | 6.51                        | (-220) | 4.20                        | 4.19                        | (240)  |
|                                 | 6.44                        | 6.44                        | (600)  |                             |                             | &(930) |
|                                 | 6.30                        | 6.33                        | (021)  | 4.14                        | 4.14                        | (640)  |
|                                 | 6.29                        | 6.28                        | (620)  | 4.13                        | 4.12                        | (1010) |
|                                 | 6.09                        | 6.08                        | (-510) | 4.10                        | 4.10                        | (140)  |
|                                 | 5.96                        | 5.97                        | (710)  | 4.03                        | 4.03                        | (-430) |
|                                 | 5.83                        | 5.82                        | (-320) | 4.01                        | 4.02                        | (740)  |
|                                 | 5.70                        | 5.71                        | (330)  | 3.96                        | 3.96                        | (040)  |
| 110 °C<br>(Col <sub>hex</sub> ) | 26.15                       | 26.18                       | (100)  |                             |                             |        |
|                                 | 15.10                       | 15.17                       | (110)  |                             |                             |        |
|                                 | 13.01                       | 13.08                       | (200)  |                             |                             |        |
| Lattice parameters              |                             |                             |        |                             |                             |        |
| <b>a</b> = 30.2 Å               |                             |                             |        |                             |                             |        |

$d_{\text{cal}}$ , calculated lattice spacing;  $d_{\text{exp}}$ , experimental lattice spacing.

**Table S2.** Characterization of the X-ray data of **2**.

|                          | $d_{\text{cal}}/\text{\AA}$ | $d_{\text{exp}}/\text{\AA}$ | $hkl$  |
|--------------------------|-----------------------------|-----------------------------|--------|-----------------------------|-----------------------------|--------|-----------------------------|-----------------------------|--------|-----------------------------|-----------------------------|--------|-----------------------------|-----------------------------|--------|
| 75 °C                    | 22.84                       | 22.85                       | (110)  | 5.01                        | 5.00                        | (241)  | 23.75                       | 23.73                       | (110)  | 5.21                        | 5.21                        | (441)  | 25.64                       | 25.65                       | (110)  |
| $C_{2v}(\text{mono}(1))$ | 18.92                       | 18.93                       | (200)  | 4.98                        | 4.96                        | (731)  | 18.43                       | 18.43                       | (200)  | 5.11                        | 5.10                        | (820)  | 17.84                       | 17.82                       | (200)  |
|                          | 15.51                       | 15.51                       | (-110) | 4.90                        | 4.90                        | (222)  | 15.93                       | 15.94                       | (-110) | 5.04                        | 5.03                        | (312)  | 15.14                       | 15.12                       | (-110) |
| Lattice parameters       | 13.84                       | 13.84                       | (310)  | 4.81                        | 4.81                        | (022)  | 13.49                       | 13.47                       | (310)  | 4.94                        | 4.92                        | (222)  | 14.20                       | 14.18                       | (310)  |
| $a = 42.10 \text{ \AA}$  | 11.42                       | 11.42                       | (220)  | 4.74                        | 4.74                        | (-710) | 11.87                       | 11.87                       | (220)  | 4.86                        | 4.87                        | (022)  | 12.82                       | 12.82                       | (220)  |
| $b = 23.00 \text{ \AA}$  | 10.33                       | 10.33                       | (020)  |                             |                             | &(800) | 9.29                        | 9.27                        | (420)  | 4.80                        | 4.80                        | (350)  | 10.76                       | 10.77                       | (020)  |
| $c = 10.86 \text{ \AA}$  | 9.32                        | 9.32                        | (420)  | 4.65                        | 4.66                        | (840)  | 9.13                        | 9.11                        | (3-10) | 4.64                        | 4.64                        | (840)  | 10.09                       | 10.07                       | (420)  |
| $\gamma = 64.00^\circ$   | 8.40                        | 8.42                        | (-310) | 4.57                        | 4.56                        | (-620) | 8.14                        | 8.12                        | (510)  | 4.55                        | 4.55                        | (150)  | 8.92                        | 8.91                        | (400)  |
|                          | 7.75                        | 7.75                        | (-220) | 4.47                        | 4.45                        | &(550) | 7.92                        | 7.93                        | (330)  | 4.42                        | 4.44                        | (750)  | 8.55                        | 8.57                        | (330)  |
|                          | 7.61                        | 7.62                        | (330)  | 4.42                        | 4.41                        | (-222) | 7.77                        | 7.75                        | (130)  | 4.38                        | 4.35                        | (910)  | 8.25                        | 8.23                        | (510)  |
|                          | 7.37                        | 7.36                        | (130)  | 4.42                        | 4.41                        | (332)  | 6.86                        | 6.85                        | (530)  | 4.31                        | 4.30                        | (5-30) | 7.92                        | 7.93                        | (130)  |
|                          | 6.90                        | 6.92                        | (620)  | 4.25                        | 4.25                        | (-530) | 6.75                        | 6.74                        | (620)  | 4.24                        | 4.24                        | (801)  | 7.51                        | 7.49                        | (530)  |
|                          | 6.79                        | 6.79                        | (530)  | 4.16                        | 4.15                        | (-241) | 6.58                        | 6.57                        | (-130) | 4.11                        | 4.14                        | (1-50) | 7.10                        | 7.08                        | (620)  |
|                          | 6.31                        | 6.30                        | (-130) | 4.32                        | 4.32                        | (150)  | 6.41                        | 6.40                        | (5-10) | 4.09                        | 4.09                        | (5-12) | 6.41                        | 6.40                        | (440)  |
|                          | 5.82                        | 5.82                        | (-420) | 4.02                        | 4.04                        | (751)  | 6.14                        | 6.13                        | (600)  | 4.06                        | 4.04                        | (911)  | 6.17                        | 6.18                        | (240)  |
|                          | 5.71                        | 5.71                        | (440)  | 3.96                        | 3.96                        | (950)  | 5.94                        | 5.93                        | (440)  | 3.95                        | 3.95                        | (1040) | 5.95                        | 5.93                        | (600)  |
|                          | 5.61                        | 5.62                        | (730)  | 3.87                        | 3.86                        | (-440) | 5.88                        | 5.86                        | (4-20) | 3.88                        | 3.88                        | (260)  | 5.88                        | 5.88                        | (5-10) |
|                          | 5.43                        | 5.43                        | (002)  | 3.80                        | 3.79                        | (-910) | 5.72                        | 5.71                        | (710)  | 3.84                        | 3.83                        | (042)  | 5.54                        | 5.52                        | (4-20) |
|                          | 5.29                        | 5.30                        | (640)  | 3.73                        | 3.74                        | (-820) | 5.56                        | 5.59                        | (730)  | 3.74                        | 3.74                        | (860)  | 5.43                        | 5.43                        | (002)  |
|                          | 5.17                        | 5.15                        | (040)  | 3.65                        | 3.66                        | (860)  | 5.43                        | 5.43                        | (002)  | 3.69                        | 3.69                        | (1000) | 5.36                        | 5.34                        | (241)  |
|                          |                             |                             |        |                             |                             |        | 5.31                        | 5.32                        | (3-30) | 3.63                        | 3.66                        | (3-50) |                             |                             |        |
| 110 °C                   | 29.88                       | 29.91                       | (100)  |                             |                             |        |                             |                             |        |                             |                             |        |                             |                             |        |
| $Col_{\text{hex}}$       | 17.25                       | 17.21                       | (110)  |                             |                             |        |                             |                             |        |                             |                             |        |                             |                             |        |
|                          | 14.94                       | 14.95                       | (200)  |                             |                             |        |                             |                             |        |                             |                             |        |                             |                             |        |
| Lattice parameters       |                             |                             |        |                             |                             |        |                             |                             |        |                             |                             |        |                             |                             |        |
| $a = 34.5 \text{ \AA}$   |                             |                             |        |                             |                             |        |                             |                             |        |                             |                             |        |                             |                             |        |

$d_{\text{cal}}$ , calculated lattice spacing;  $d_{\text{exp}}$ , experimental lattice spacing.
